# Supplementary material for: Reduced Infection Efficiency of Phage NCTC 12673 on Non-Motile Campylobacter jejuni Strains Is Related to Oxidative Stress
Source: MDPI journal article supplement (doi:10.3390/v13101955), 2021-09-29
Supplement: s1 [file s1]

**Supplementary data for Sacher et al. manuscript:**

**Reduced infection efficiency of phage NCTC 12673 on non-motile *Campylobacter jejuni* strains is related to oxidative stress**

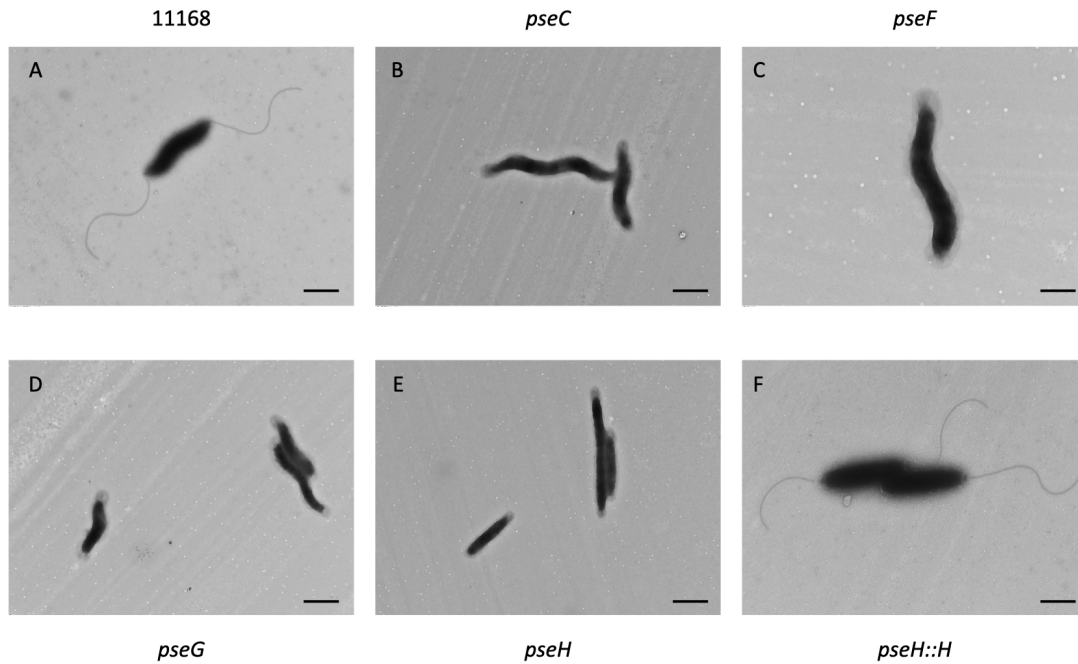

**Figure S1.** Transmission electron micrographs showing presence of flagella in wild type *C. jejuni* 11168 cells (**A**), absence of flagella in *pseC-H* mutants (**B–E**), and restoration of flagella in the *pseH::H* complement strain (**F**). Scale bars are 800 nm.

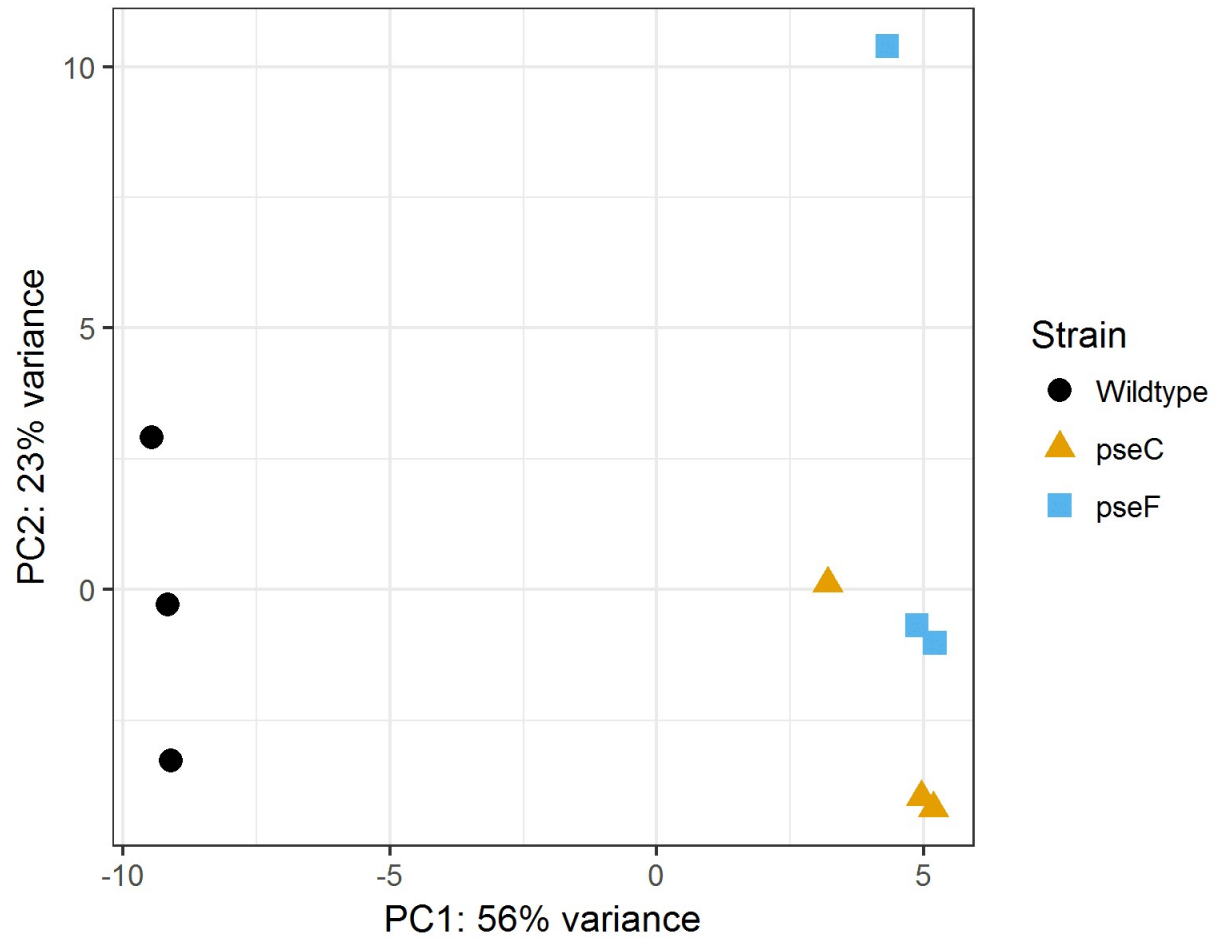

**Figure S2.** Principal component analysis (PCA) plot for *C. jejuni* NCTC 11168 wild type and mutant cells: wild type,  $\Delta pseC$  and  $\Delta pseF$ . Plots were generated using the data from the 500 genes with the greatest variation in expression across samples.

**Table S1.** Differentially expressed genes for *C. jejuni* NCTC 11168 wild type and mutant cells:  $\Delta pseC$  vs. wild type,  $\Delta pseF$  vs. wild type, and  $\Delta pseF$  vs.  $\Delta pseC$ . Genes with false discovery rate (FDR)-corrected *P*-value of < 0.05 (adjusted *P*-value, or padj) are shown. Changes are expressed as log<sub>2</sub>foldChange, and are listed from lowest to highest adjusted *P*-value.

| Gene Names     | <i>pseC</i> vs. wild type    |      |
|----------------|------------------------------|------|
|                | log <sub>2</sub> Fold Change | padj |
| <i>flgE2</i>   | -5.65                        | 0.00 |
| <i>flaB</i>    | -4.69                        | 0.00 |
| <i>metB</i>    | 4.35                         | 0.00 |
| <i>metA</i>    | 4.34                         | 0.00 |
| <i>cj0501</i>  | -4.33                        | 0.00 |
| <i>flgE</i>    | -4.92                        | 0.00 |
| <i>flgD</i>    | -4.67                        | 0.00 |
| <i>cj0887c</i> | -3.82                        | 0.00 |
| <i>flgK</i>    | -3.77                        | 0.00 |
| <i>flgH</i>    | -4.32                        | 0.00 |
| <i>flgI</i>    | -4.37                        | 0.00 |
| <i>gltB</i>    | -2.74                        | 0.00 |
| <i>glnA</i>    | -3.71                        | 0.00 |
| <i>flgG2</i>   | -3.44                        | 0.00 |
| <i>cj0008</i>  | -2.71                        | 0.00 |
| <i>flgG</i>    | -2.64                        | 0.00 |
| <i>asd</i>     | -2.89                        | 0.00 |
| <i>gltD</i>    | -2.60                        | 0.00 |
| <i>fliK</i>    | -4.37                        | 0.00 |
| <i>cj0391c</i> | -1.98                        | 0.00 |
| <i>cj1650</i>  | -4.36                        | 0.00 |
| <i>cj1295</i>  | -5.47                        | 0.00 |
| <i>cj1656c</i> | -1.73                        | 0.00 |
| <i>cj1242</i>  | -5.52                        | 0.00 |
| <i>cj1022c</i> | -1.76                        | 0.00 |
| <i>cj0044c</i> | -2.26                        | 0.00 |
| <i>cj0040</i>  | -5.94                        | 0.00 |

|                |       |      |
|----------------|-------|------|
| <i>flgJ</i>    | -4.21 | 0.00 |
| <i>neuB2</i>   | -1.75 | 0.00 |
| <i>flgB</i>    | -1.97 | 0.00 |
| <i>cj1325</i>  | -1.54 | 0.00 |
| <i>flgR</i>    | -1.58 | 0.00 |
| <i>cj0977</i>  | -1.88 | 0.00 |
| <i>cj0859c</i> | -2.03 | 0.00 |
| <i>flaA</i>    | -1.35 | 0.00 |
| <i>cj1465</i>  | -1.86 | 0.00 |
| <i>cj0243c</i> | -4.25 | 0.00 |
| <i>hddA</i>    | 1.22  | 0.00 |
| <i>fliD</i>    | -1.18 | 0.00 |
| <i>cj1422c</i> | 1.72  | 0.00 |
| <i>cj0554</i>  | -1.02 | 0.00 |
| <i>cj1296</i>  | -3.33 | 0.00 |
| <i>cj0552</i>  | -1.14 | 0.00 |
| <i>cj0553</i>  | -0.92 | 0.00 |
| <i>cj0986c</i> | -1.48 | 0.00 |
| <i>cj1450</i>  | -1.14 | 0.00 |
| <i>rplN</i>    | 1.07  | 0.00 |
| <i>rpsN</i>    | 1.17  | 0.00 |
| <i>pseB</i>    | -0.93 | 0.00 |
| <i>livJ</i>    | -0.92 | 0.00 |
| <i>rplX</i>    | 1.09  | 0.00 |
| <i>nrdA</i>    | 0.88  | 0.00 |
| <i>acs</i>     | -1.12 | 0.00 |
| <i>rplP</i>    | 0.99  | 0.00 |
| <i>putA</i>    | -0.77 | 0.00 |
| <i>rplB</i>    | 0.91  | 0.00 |
| <i>purB</i>    | 0.78  | 0.00 |
| <i>cj1631c</i> | -1.22 | 0.00 |
| <i>rpsB</i>    | 0.84  | 0.00 |
| <i>rplD</i>    | 0.86  | 0.00 |
| <i>cj1500</i>  | 1.27  | 0.00 |

|                |       |      |
|----------------|-------|------|
| <i>rplW</i>    | 1.02  | 0.00 |
| <i>flgM</i>    | -1.09 | 0.00 |
| <i>cj0021c</i> | -0.75 | 0.00 |
| <i>rpsQ</i>    | 0.99  | 0.00 |
| <i>neuC2</i>   | -1.24 | 0.00 |
| <i>rpsC</i>    | 0.97  | 0.00 |
| <i>rpsH</i>    | 0.78  | 0.00 |
| <i>fliS</i>    | -0.99 | 0.00 |
| <i>rpsS</i>    | 0.92  | 0.00 |
| <i>secY</i>    | 0.78  | 0.00 |
| <i>cj0045c</i> | -1.50 | 0.00 |
| <i>cj0037c</i> | -1.00 | 0.00 |
| <i>cj1020c</i> | -1.01 | 0.00 |
| <i>glmS</i>    | 0.70  | 0.00 |
| <i>pseC</i>    | -0.77 | 0.00 |
| <i>peb1A</i>   | -0.81 | 0.00 |
| <i>metK</i>    | 0.72  | 0.00 |
| <i>cj1164c</i> | 0.73  | 0.00 |
| <i>rpmC</i>    | 1.15  | 0.00 |
| <i>fusA</i>    | 0.81  | 0.00 |
| <i>livK</i>    | -0.71 | 0.00 |
| <i>petB</i>    | 0.65  | 0.00 |
| <i>peb3</i>    | 0.72  | 0.00 |
| <i>rplV</i>    | 0.89  | 0.00 |
| <i>pseD</i>    | -0.99 | 0.00 |
| <i>cj0920c</i> | -0.62 | 0.00 |
| <i>cj0919c</i> | -0.64 | 0.00 |
| <i>putP</i>    | -0.63 | 0.00 |
| <i>cj0089</i>  | 0.67  | 0.00 |
| <i>cj0949c</i> | 0.89  | 0.00 |
| <i>kgtP</i>    | -0.56 | 0.00 |
| <i>rpsM</i>    | 0.89  | 0.00 |
| <i>rpsL</i>    | 0.86  | 0.00 |
| <i>cj1608</i>  | -0.86 | 0.00 |

|                |       |      |
|----------------|-------|------|
| <i>cj1026c</i> | -0.79 | 0.00 |
| <i>cj0203</i>  | -0.73 | 0.00 |
| <i>cj0935c</i> | -0.67 | 0.00 |
| <i>pebC</i>    | -0.59 | 0.00 |
| <i>ilvE</i>    | 0.67  | 0.00 |
| <i>rplO</i>    | 0.83  | 0.00 |
| <i>petA</i>    | 0.67  | 0.00 |
| <i>infC</i>    | 0.70  | 0.00 |
| <i>rpoC</i>    | 0.64  | 0.00 |
| <i>cj0989</i>  | -1.16 | 0.00 |
| <i>purL</i>    | 0.75  | 0.00 |
| <i>cj1609</i>  | -0.60 | 0.00 |
| <i>cj1709c</i> | 1.23  | 0.00 |
| <i>cj1365c</i> | 0.64  | 0.00 |
| <i>ptmA</i>    | -0.85 | 0.00 |
| <i>thrS</i>    | 0.56  | 0.00 |
| <i>rplR</i>    | 0.79  | 0.00 |
| <i>rpmJ</i>    | 0.99  | 0.00 |
| <i>cj0958c</i> | 0.65  | 0.00 |
| <i>rplE</i>    | 0.82  | 0.00 |
| <i>argC</i>    | 0.82  | 0.00 |
| <i>rplF</i>    | 0.71  | 0.00 |
| <i>gmhA2</i>   | 0.72  | 0.00 |
| <i>cj0947c</i> | 0.74  | 0.00 |
| <i>rpsE</i>    | 0.77  | 0.01 |
| <i>purH</i>    | 0.74  | 0.01 |
| <i>ppi</i>     | 0.81  | 0.01 |
| <i>cj0091</i>  | 0.67  | 0.01 |
| <i>dnaK</i>    | 0.63  | 0.01 |
| <i>tsf</i>     | 0.63  | 0.01 |
| <i>fdhC</i>    | -0.84 | 0.01 |
| <i>rpoB</i>    | 0.52  | 0.01 |
| <i>rpmH</i>    | 0.89  | 0.01 |
| <i>flaG</i>    | -0.76 | 0.01 |

|                |       |      |
|----------------|-------|------|
| <i>rplL</i>    | 0.71  | 0.01 |
| <i>rpsD</i>    | 0.73  | 0.01 |
| <i>dut</i>     | -0.60 | 0.01 |
| <i>ung</i>     | -0.74 | 0.01 |
| <i>cj0550</i>  | -1.11 | 0.01 |
| <i>cj0903c</i> | -0.67 | 0.01 |
| <i>cj0830</i>  | -0.68 | 0.01 |
| <i>cj0909</i>  | -0.56 | 0.01 |
| <i>cj1013c</i> | -0.53 | 0.01 |
| <i>pstS</i>    | 0.93  | 0.01 |
| <i>panD</i>    | 0.65  | 0.01 |
| <i>rplQ</i>    | 0.64  | 0.01 |
| <i>cj1426c</i> | 0.58  | 0.01 |
| <i>ilvC</i>    | 0.59  | 0.02 |
| <i>cj0093</i>  | 0.63  | 0.02 |
| <i>cj1034c</i> | -0.88 | 0.02 |
| <i>cj1172c</i> | 0.77  | 0.02 |
| <i>rplM</i>    | 0.69  | 0.02 |
| <i>fmt</i>     | 0.89  | 0.02 |
| <i>cj0268c</i> | 0.60  | 0.02 |
| <i>rpmA</i>    | 0.54  | 0.02 |
| <i>cj0505c</i> | 0.71  | 0.02 |
| <i>petC</i>    | 0.49  | 0.02 |
| <i>fdhB</i>    | -0.77 | 0.02 |
| <i>cj1180c</i> | 1.00  | 0.02 |
| <i>mrp</i>     | 0.52  | 0.02 |
| <i>p19</i>     | -0.74 | 0.02 |
| <i>cj0777</i>  | 0.74  | 0.02 |
| <i>omp50</i>   | 0.61  | 0.02 |
| <i>cj1191c</i> | 0.76  | 0.02 |
| <i>cj0073c</i> | -0.48 | 0.02 |
| <i>cj0092</i>  | 0.58  | 0.02 |
| <i>dapA</i>    | -0.68 | 0.02 |
| <i>rpsG</i>    | 0.58  | 0.02 |

|                |       |      |
|----------------|-------|------|
| <i>cj1342c</i> | -0.69 | 0.02 |
| <i>cj0129c</i> | 0.49  | 0.02 |
| <i>cj1329</i>  | -0.67 | 0.03 |
| <i>ptmB</i>    | -0.62 | 0.03 |
| <i>htpG</i>    | 0.49  | 0.03 |
| <i>rpoA</i>    | 0.63  | 0.03 |
| <i>cydA</i>    | 0.63  | 0.03 |
| <i>cj1340c</i> | -0.75 | 0.03 |
| <i>pta</i>     | -0.46 | 0.03 |
| <i>hisH</i>    | -0.92 | 0.03 |
| <i>livM</i>    | -0.67 | 0.03 |
| <i>cj1075</i>  | -0.51 | 0.03 |
| <i>atpC</i>    | 0.54  | 0.03 |
| <i>cj0417</i>  | -1.20 | 0.03 |
| <i>rpsP</i>    | 0.70  | 0.04 |
| <i>cj0457c</i> | -0.63 | 0.04 |
| <i>cj1666c</i> | 0.59  | 0.04 |
| <i>typA</i>    | 0.51  | 0.04 |
| <i>cj1021c</i> | -1.15 | 0.04 |
| <i>rpsK</i>    | 0.64  | 0.04 |
| <i>panB</i>    | 0.49  | 0.04 |
| <i>nusG</i>    | 0.51  | 0.04 |
| <i>dnaJ</i>    | 0.63  | 0.04 |
| <i>argD</i>    | 0.97  | 0.05 |
| <i>dapB</i>    | 0.49  | 0.05 |

---

| <i>pseF</i> vs. wild type |                              |      |
|---------------------------|------------------------------|------|
| Gene Names                | log <sub>2</sub> Fold Change | padj |
| <i>flgE2</i>              | -7.73                        | 0.00 |
| <i>flaB</i>               | -5.91                        | 0.00 |
| <i>cj0501</i>             | -4.78                        | 0.00 |
| <i>flgE</i>               | -6.15                        | 0.00 |



|                |       |      |
|----------------|-------|------|
| <i>flgK</i>    | -4.91 | 0.00 |
| <i>flgD</i>    | -6.42 | 0.00 |
| <i>flgI</i>    | -4.91 | 0.00 |
| <i>flgH</i>    | -4.73 | 0.00 |
| <i>glnA</i>    | -4.13 | 0.00 |
| <i>cj0887c</i> | -3.41 | 0.00 |
| <i>gltB</i>    | -2.93 | 0.00 |
| <i>flgG2</i>   | -3.77 | 0.00 |
| <i>cj0008</i>  | -2.83 | 0.00 |
| <i>flgG</i>    | -2.98 | 0.00 |
| <i>gltD</i>    | -2.97 | 0.00 |
| <i>cj0391c</i> | -2.36 | 0.00 |
| <i>fliK</i>    | -5.10 | 0.00 |
| <i>pseG</i>    | -4.91 | 0.00 |
| <i>cj1650</i>  | -4.82 | 0.00 |
| <i>cj1656c</i> | -1.93 | 0.00 |
| <i>cj1242</i>  | -6.27 | 0.00 |
| <i>fliD</i>    | -1.72 | 0.00 |
| <i>flaA</i>    | -1.67 | 0.00 |
| <i>flgB</i>    | -2.01 | 0.00 |
| <i>cj0859c</i> | -2.29 | 0.00 |
| <i>cj0977</i>  | -1.97 | 0.00 |
| <i>cj0044c</i> | -2.07 | 0.00 |
| <i>flgJ</i>    | -5.76 | 0.00 |
| <i>cj0040</i>  | -6.57 | 0.00 |
| <i>acs</i>     | -1.55 | 0.00 |
| <i>cj1450</i>  | -1.39 | 0.00 |
| <i>pseB</i>    | -1.14 | 0.00 |
| <i>fliS</i>    | -1.51 | 0.00 |
| <i>cj1465</i>  | -1.90 | 0.00 |
| <i>pseF</i>    | -1.50 | 0.00 |
| <i>flaG</i>    | -1.45 | 0.00 |
| <i>nrdA</i>    | 1.04  | 0.00 |
| <i>putA</i>    | -0.95 | 0.00 |

|                |       |      |
|----------------|-------|------|
| <i>cj0243c</i> | -4.02 | 0.00 |
| <i>peb1A</i>   | -1.16 | 0.00 |
| <i>cj1026c</i> | -1.25 | 0.00 |
| <i>pseH</i>    | -4.99 | 0.00 |
| <i>fldA</i>    | -1.05 | 0.00 |
| <i>putP</i>    | -0.92 | 0.00 |
| <i>cj0554</i>  | -0.93 | 0.00 |
| <i>cj0553</i>  | -0.86 | 0.00 |
| <i>cj0037c</i> | -1.31 | 0.00 |
| <i>cj1631c</i> | -1.46 | 0.00 |
| <i>rpsN</i>    | 1.13  | 0.00 |
| <i>cj0986c</i> | -1.37 | 0.00 |
| <i>cj0552</i>  | -1.02 | 0.00 |
| <i>purB</i>    | 0.84  | 0.00 |
| <i>cj0045c</i> | -1.89 | 0.00 |
| <i>flgM</i>    | -1.19 | 0.00 |
| <i>cj0021c</i> | -0.81 | 0.00 |
| <i>acnB</i>    | -0.96 | 0.00 |
| <i>pebC</i>    | -0.77 | 0.00 |
| <i>secY</i>    | 0.83  | 0.00 |
| <i>cj0903c</i> | -0.96 | 0.00 |
| <i>pseC</i>    | -0.84 | 0.00 |
| <i>mdh</i>     | -0.78 | 0.00 |
| <i>icd</i>     | -0.74 | 0.00 |
| <i>rplN</i>    | 0.84  | 0.00 |
| <i>murD</i>    | 1.02  | 0.00 |
| <i>sucC</i>    | -0.86 | 0.00 |
| <i>cj1500</i>  | 1.18  | 0.00 |
| <i>cj0203</i>  | -0.85 | 0.00 |
| <i>sucD</i>    | -0.77 | 0.00 |
| <i>ribA</i>    | -0.86 | 0.00 |
| <i>cj1309c</i> | -0.75 | 0.00 |
| <i>cj0949c</i> | 0.96  | 0.00 |
| <i>oorA</i>    | -0.68 | 0.00 |

|                |       |      |
|----------------|-------|------|
| <i>rpsQ</i>    | 0.90  | 0.00 |
| <i>oorD</i>    | -0.79 | 0.00 |
| <i>fdhA</i>    | -0.78 | 0.00 |
| <i>cj0073c</i> | -0.67 | 0.00 |
| <i>cj0920c</i> | -0.63 | 0.00 |
| <i>lctP</i>    | -0.73 | 0.00 |
| <i>dut</i>     | -0.74 | 0.00 |
| <i>cj1365c</i> | 0.70  | 0.00 |
| <i>cj0878</i>  | 1.02  | 0.00 |
| <i>cj0864</i>  | -0.99 | 0.00 |
| <i>sdaA</i>    | -0.60 | 0.00 |
| <i>cj0415</i>  | -0.80 | 0.00 |
| <i>cj0834c</i> | -0.65 | 0.00 |
| <i>rplX</i>    | 0.79  | 0.00 |
| <i>oorC</i>    | -0.63 | 0.00 |
| <i>cj0604</i>  | -0.73 | 0.00 |
| <i>rplB</i>    | 0.71  | 0.00 |
| <i>kgfP</i>    | -0.54 | 0.00 |
| <i>frdA</i>    | -0.70 | 0.00 |
| <i>cj1013c</i> | 0.61  | 0.00 |
| <i>cj0958c</i> | 0.68  | 0.00 |
| <i>cj0947c</i> | 0.79  | 0.00 |
| <i>oorB</i>    | -0.68 | 0.00 |
| <i>argC</i>    | 0.85  | 0.00 |
| <i>cj0075c</i> | -0.72 | 0.00 |
| <i>cj0833c</i> | -0.57 | 0.00 |
| <i>cj0074c</i> | -0.66 | 0.00 |
| <i>gltA</i>    | -0.68 | 0.00 |
| <i>ffh</i>     | 0.68  | 0.00 |
| <i>cj1191c</i> | 0.92  | 0.00 |
| <i>clpB</i>    | -0.70 | 0.00 |
| <i>cj0777</i>  | 0.88  | 0.00 |
| <i>livH</i>    | 0.74  | 0.00 |
| <i>cj0873c</i> | -0.77 | 0.00 |

|                |       |      |
|----------------|-------|------|
| <i>lon</i>     | 0.63  | 0.00 |
| <i>argD</i>    | 1.25  | 0.01 |
| <i>rpsC</i>    | 0.75  | 0.01 |
| <i>cj1180c</i> | 1.14  | 0.01 |
| <i>rplP</i>    | 0.67  | 0.01 |
| <i>cj1215</i>  | 0.69  | 0.01 |
| <i>cj0711</i>  | 1.05  | 0.01 |
| <i>ksgA</i>    | 0.86  | 0.01 |
| <i>flaC</i>    | -0.82 | 0.01 |
| <i>glmS</i>    | 0.56  | 0.01 |
| <i>hisH</i>    | 0.75  | 0.01 |
| <i>cj0716</i>  | -0.61 | 0.01 |
| <i>dnaX</i>    | 0.66  | 0.01 |
| <i>cj0186c</i> | 0.86  | 0.01 |
| <i>cstA</i>    | -0.69 | 0.01 |
| <i>petB</i>    | 0.53  | 0.01 |
| <i>fdhB</i>    | -0.84 | 0.01 |
| <i>rpsH</i>    | 0.59  | 0.01 |
| <i>hydB</i>    | -0.56 | 0.01 |
| <i>cj1089c</i> | 0.98  | 0.01 |
| <i>cj0544</i>  | 1.15  | 0.01 |
| <i>groEL</i>   | -0.65 | 0.01 |
| <i>cj1367c</i> | 0.74  | 0.01 |
| <i>cj0505c</i> | 0.76  | 0.01 |
| <i>cj0715</i>  | -0.63 | 0.01 |
| <i>ruvB</i>    | 0.62  | 0.01 |
| <i>infC</i>    | 0.63  | 0.01 |
| <i>rpsS</i>    | 0.68  | 0.01 |
| <i>cj1609</i>  | -0.54 | 0.01 |
| <i>cj0559</i>  | -0.55 | 0.01 |
| <i>cj0826</i>  | 0.92  | 0.01 |
| <i>cj0948c</i> | 1.04  | 0.01 |
| <i>cj0504c</i> | 1.10  | 0.01 |
| <i>cj0417</i>  | -1.44 | 0.01 |

|                |       |      |
|----------------|-------|------|
| <i>fdhC</i>    | -0.79 | 0.01 |
| <i>cj1417c</i> | 0.93  | 0.01 |
| <i>thiC</i>    | -0.64 | 0.01 |
| <i>pseA</i>    | -0.63 | 0.01 |
| <i>cadF</i>    | -0.54 | 0.01 |
| <i>rplR</i>    | 0.70  | 0.01 |
| <i>frdC</i>    | -0.51 | 0.01 |
| <i>selB</i>    | 0.83  | 0.01 |
| <i>cj0485</i>  | -0.89 | 0.01 |
| <i>ispH</i>    | 0.73  | 0.01 |
| <i>cj1074c</i> | 0.59  | 0.01 |
| <i>rpmC</i>    | 0.88  | 0.01 |
| <i>p19</i>     | -0.79 | 0.01 |
| <i>cj0005c</i> | -0.70 | 0.02 |
| <i>cj1501</i>  | 1.46  | 0.02 |
| <i>cetA</i>    | -0.51 | 0.02 |
| <i>cj0448c</i> | -0.56 | 0.02 |
| <i>cj0129c</i> | 0.51  | 0.02 |
| <i>pabB</i>    | 1.08  | 0.02 |
| <i>cj0605</i>  | -0.57 | 0.02 |
| <i>argB</i>    | 1.41  | 0.02 |
| <i>ppi</i>     | 0.72  | 0.02 |
| <i>cj1373</i>  | 0.86  | 0.02 |
| <i>cj1485c</i> | 1.13  | 0.02 |
| <i>cj0520</i>  | 1.04  | 0.02 |
| <i>cj0154c</i> | 1.24  | 0.02 |
| <i>tsf</i>     | 0.56  | 0.02 |
| <i>cj0264c</i> | -0.62 | 0.02 |
| <i>cj0919c</i> | -0.49 | 0.02 |
| <i>livM</i>    | 0.68  | 0.02 |
| <i>cj1666c</i> | 0.64  | 0.02 |
| <i>cj0621</i>  | 0.72  | 0.02 |
| <i>cj1154c</i> | 1.79  | 0.02 |
| <i>fnt</i>     | 0.87  | 0.02 |

|                |       |      |
|----------------|-------|------|
| <i>cj1476c</i> | -0.50 | 0.02 |
| <i>cj0957c</i> | 0.70  | 0.03 |
| <i>mraY</i>    | 0.62  | 0.03 |
| <i>dapD</i>    | 0.61  | 0.03 |
| <i>purL</i>    | 0.60  | 0.03 |
| <i>cj0122</i>  | -1.85 | 0.03 |
| <i>thrS</i>    | 0.45  | 0.03 |
| <i>rplK</i>    | 0.45  | 0.03 |
| <i>cj0489</i>  | -0.71 | 0.03 |
| <i>trmE</i>    | 0.75  | 0.03 |
| <i>hypC</i>    | -0.66 | 0.03 |
| <i>mgo</i>     | -0.45 | 0.03 |
| <i>dcd</i>     | -0.63 | 0.03 |
| <i>cj0669</i>  | 0.60  | 0.03 |
| <i>livG</i>    | 0.83  | 0.03 |
| <i>ktrB</i>    | 0.90  | 0.03 |
| <i>hisI</i>    | 0.66  | 0.03 |
| <i>serS</i>    | -0.50 | 0.03 |
| <i>cj1164c</i> | 0.50  | 0.03 |
| <i>rpoN</i>    | 0.66  | 0.03 |
| <i>cj0256</i>  | 0.77  | 0.03 |
| <i>peb3</i>    | 0.50  | 0.03 |
| <i>serA</i>    | -0.48 | 0.03 |
| <i>cj1602</i>  | 0.68  | 0.03 |
| <i>cj0935c</i> | -0.51 | 0.03 |
| <i>uxaA'</i>   | -0.67 | 0.03 |
| <i>cj0830</i>  | -0.62 | 0.03 |
| <i>gmhA</i>    | -0.54 | 0.03 |
| <i>flgC</i>    | -0.52 | 0.03 |
| <i>hydA</i>    | -0.56 | 0.03 |
| <i>rplF</i>    | 0.57  | 0.03 |
| <i>cj0353c</i> | 0.64  | 0.03 |
| <i>gatC</i>    | -0.60 | 0.03 |
| <i>hemB</i>    | -0.52 | 0.03 |

|                |       |      |
|----------------|-------|------|
| <i>nuoI</i>    | -0.50 | 0.03 |
| <i>glmM</i>    | -0.55 | 0.03 |
| <i>cj0089</i>  | 0.48  | 0.03 |
| <i>cydA</i>    | 0.61  | 0.03 |
| <i>maf</i>     | 0.95  | 0.03 |
| <i>cj1324</i>  | -0.44 | 0.03 |
| <i>typA</i>    | -0.51 | 0.04 |
| <i>ilvI</i>    | -0.47 | 0.04 |
| <i>hisF</i>    | 0.65  | 0.04 |
| <i>cj1541</i>  | -0.48 | 0.04 |
| <i>rpsL</i>    | 0.62  | 0.04 |
| <i>nuoB</i>    | -0.56 | 0.04 |
| <i>cj0573</i>  | -0.64 | 0.04 |
| <i>nuoD</i>    | -0.43 | 0.04 |
| <i>cj0592c</i> | -0.61 | 0.04 |
| <i>murF</i>    | -0.50 | 0.04 |
| <i>rplW</i>    | 0.59  | 0.04 |
| <i>sdhC</i>    | -0.46 | 0.04 |
| <i>cj0550</i>  | -0.94 | 0.04 |
| <i>trxB</i>    | -0.51 | 0.04 |
| <i>cmeF</i>    | 0.53  | 0.04 |
| <i>purD</i>    | -0.46 | 0.04 |
| <i>cmeA</i>    | -0.75 | 0.04 |
| <i>cj0440c</i> | -0.63 | 0.04 |
| <i>cj0832c</i> | -0.41 | 0.04 |
| <i>dsbB</i>    | -0.72 | 0.04 |
| <i>metE</i>    | -0.82 | 0.04 |
| <i>ispDF</i>   | -0.45 | 0.05 |
| <i>rpsO</i>    | 0.71  | 0.05 |
| <i>rpsB</i>    | 0.47  | 0.05 |
| <i>cj0608</i>  | 0.61  | 0.05 |

---

| <i>pseF</i> vs. <i>pseC</i> |                                    |             |
|-----------------------------|------------------------------------|-------------|
| <i>Gene Names</i>           | <b>log<sub>2</sub> Fold Change</b> | <b>padj</b> |
| <i>metB</i>                 | -4.81                              | 0.00        |
| <i>metA</i>                 | -4.77                              | 0.00        |
| <i>pseG</i>                 | -4.84                              | 0.00        |
| <i>asd</i>                  | 2.43                               | 0.00        |
| <i>cj1295</i>               | 5.00                               | 0.00        |
| <i>cj1022c</i>              | 1.78                               | 0.00        |
| <i>cj1422c</i>              | -2.49                              | 0.00        |
| <i>flgE2</i>                | -2.08                              | 0.00        |
| <i>livJ</i>                 | 1.28                               | 0.00        |
| <i>cj1325</i>               | 1.39                               | 0.00        |
| <i>neuB2</i>                | 1.48                               | 0.00        |
| <i>flgR</i>                 | 1.41                               | 0.00        |
| <i>cj1013c</i>              | 1.14                               | 0.00        |
| <i>livH</i>                 | 1.24                               | 0.00        |
| <i>livM</i>                 | 1.34                               | 0.00        |
| <i>livK</i>                 | 0.99                               | 0.00        |
| <i>pseH</i>                 | -4.73                              | 0.00        |
| <i>typA</i>                 | -1.02                              | 0.00        |
| <i>cj1020c</i>              | 1.28                               | 0.00        |
| <i>hddA</i>                 | -1.00                              | 0.00        |
| <i>flaB</i>                 | -1.22                              | 0.00        |
| <i>neuC2</i>                | 1.33                               | 0.00        |
| <i>cj1296</i>               | 2.75                               | 0.00        |
| <i>flgD</i>                 | -1.75                              | 0.00        |
| <i>cj1426c</i>              | -0.84                              | 0.00        |
| <i>livG</i>                 | 1.28                               | 0.00        |
| <i>pseF</i>                 | -1.01                              | 0.00        |
| <i>livF</i>                 | 1.11                               | 0.00        |
| <i>flgK</i>                 | -1.14                              | 0.00        |
| <i>cj1021c</i>              | 1.60                               | 0.00        |
| <i>cj1012c</i>              | 1.83                               | 0.00        |
| <i>gmhA2</i>                | -0.79                              | 0.00        |



|                |       |      |
|----------------|-------|------|
| <i>cj1330</i>  | 0.98  | 0.01 |
| <i>flgE</i>    | -1.23 | 0.01 |
| <i>cj1075</i>  | 0.65  | 0.01 |
| <i>cj1329</i>  | 0.81  | 0.01 |
| <i>fldA</i>    | -0.64 | 0.01 |
| <i>rpsI</i>    | -0.66 | 0.02 |
| <i>frdA</i>    | -0.63 | 0.02 |
| <i>cj0669</i>  | 0.68  | 0.03 |
| <i>cj1309c</i> | -0.58 | 0.03 |
| <i>rpoN</i>    | 0.74  | 0.03 |
| <i>groEL</i>   | -0.63 | 0.03 |
| <i>cj0989</i>  | 1.01  | 0.03 |
| <i>sdhC</i>    | -0.55 | 0.04 |

**Table S2.** Complete list of genetic polymorphisms and variant frequencies between NCTC 12673 phage (parent) and MutC, a spontaneous mutant phage isolated on *C. jejuni* 11168  $\Delta$ *pseC* mutant cells.

| Gene                          | Predicted function                        | Phage  | Min     | Max     | Amino Acid Change | Change         | Codon Change | Polymorphism Type         | Variant Frequency |
|-------------------------------|-------------------------------------------|--------|---------|---------|-------------------|----------------|--------------|---------------------------|-------------------|
| <i>gp047</i>                  | FlaGrab, flagellar glycan binding protein | MutC   | 40,821  | 40,821  | Frame Shift       | (A)7 -> (A)6   | Frame Shift  | Deletion (tandem repeat)  | 68.80%            |
| <i>gp114/</i><br><i>gp115</i> | Hypothetical protein                      | MutC   | 100,737 | 100,736 | Frame Shift       | (CC)4 -> (CC)5 | Frame Shift  | Insertion (tandem repeat) | 37.00%            |
| <i>gp116</i>                  | Hypothetical protein                      | Parent | 101,692 | 101,691 | Frame Shift       | (C)11 -> (C)12 | Frame Shift  | Insertion (tandem repeat) | 28.90%            |
| <i>gp116</i>                  | Hypothetical protein                      | Parent | 101,691 | 101,691 | Frame Shift       | (C)11 -> (C)10 | Frame Shift  | Deletion (tandem repeat)  | 27.10%            |
| <i>gp116</i>                  | Hypothetical protein                      | MutC   | 101,691 | 101,691 | Frame Shift       | (C)11 -> (C)10 | Frame Shift  | Deletion (tandem repeat)  | 62.80%            |

|                                     |                                 |        |         |         |                              |               |                              |                              |               |
|-------------------------------------|---------------------------------|--------|---------|---------|------------------------------|---------------|------------------------------|------------------------------|---------------|
| <i>gp041</i>                        | gp6 baseplate<br>wedge subunit  | MutC   | 31,844  | 31,844  | L -> S                       | A -> G        | TTA -> TCA                   | SNP (transition)             | 72.70%        |
| <i>gp058</i>                        | Hef59                           | MutC   | 50,606  | 50,607  | E -> G                       | AA -> GG      | GAA -> GGG                   | Substitution                 | 69.8% - 69.9% |
| <i>gp167</i>                        | Hef168                          | MutC   | 132,316 | 132,316 | D -> N                       | C -> T        | GAT -> AAT                   | SNP (transition)             | 64.00%        |
| <i>gp116</i>                        | Hypothetical<br>protein         | MutC   | 101,202 | 101,202 | T -> M                       | G -> A        | ACG -> ATG                   | SNP (transition)             | 68.70%        |
| <i>gp116</i>                        | Hypothetical<br>protein         | Parent | 101,112 | 101,112 | T -> N                       | G -> T        | ACT -> AAT                   | SNP<br>(transversion)        | 73.80%        |
| <i>gp041</i>                        | gp6, baseplate<br>wedge subunit | MutC   | 31,885  | 31,885  | M -> I                       | C -> T        | ATG -> ATA                   | SNP (transition)             | 25.60%        |
| <i>gp114/<br/>gp115</i>             | Hypothetical<br>protein         | Parent | 100,737 | 100,736 | Frame Shift                  | (C)9 -> (C)10 | Frame Shift                  | Insertion<br>(tandem repeat) | 31.20%        |
| <i>gp114/<br/>gp115</i>             | Hypothetical<br>protein         | MutC   | 100,737 | 100,736 | Frame Shift                  | (C)9 -> (C)10 | Frame Shift                  | Insertion<br>(tandem repeat) | 43.70%        |
| up-<br>stream<br>of<br><i>gp113</i> | Intergenic<br>region            | Parent | 99,920  | 99,921  | N/A (not<br>within a<br>CDS) | AC -> GT      | N/A (not<br>within a<br>CDS) | Substitution                 | 73.9% - 77.1% |
| up-<br>stream<br>of<br><i>gp113</i> | Intergenic<br>region            | MutC   | 99,920  | 99,921  | N/A (not<br>within a<br>CDS) | AC -> GT      | N/A (not<br>within a<br>CDS) | Substitution                 | 98.5% - 98.6% |
| <i>gp047</i>                        | Putative tail<br>fibre          | Parent | 40,935  | 40,935  | Frame Shift                  | (A)7 -> (A)6  | Frame Shift                  | Deletion<br>(tandem repeat)  | 33.20%        |
| <i>gp047</i>                        | Putative tail<br>fibre          | MutC   | 40,935  | 40,935  | Frame Shift                  | (A)7 -> (A)6  | Frame Shift                  | Deletion<br>(tandem repeat)  | 25.30%        |
